# Supplementary material for: Redox Regulation of Monodehydroascorbate Reductase by Thioredoxin y in Plastids Revealed in the Context of Water Stress
Source: PubMed Central journal article supplement (PMC6316508; doi:10.3390/antiox7120183), 2018-12-06
Supplement: antioxidants-07-00183-s001.pdf [file antioxidants-07-00183-s001.pdf]

**Supplementary Materials**
**Table S1.** List of primers used for cloning AtMDHAR6 cDNA in pGENI expression plasmid.

|                 |                                  |
|-----------------|----------------------------------|
| MDHAR6-up-Nco   | AAACCATGGCATTCTCCGATCGGTTCTAG    |
| MDHAR6-down-Xho | GGAAACTTCATGGAGTTTTTTAACTCGAGAAA |
| pET-seq-up      | CTCTAGAAATAATTTGTTTAACTTTAAGAAGG |
| pET-seq-down    | GCTGAGCAATAACTAGCATAA            |

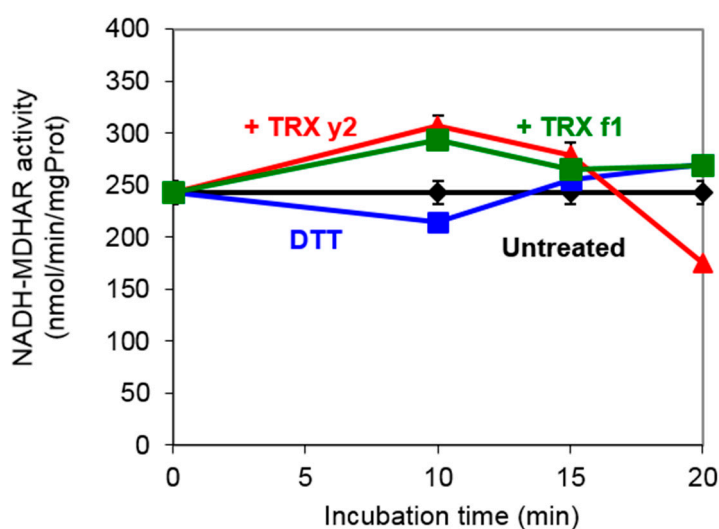

**Figure S1.** Effect of TRX treatments on NADH-dependent MDHAR activity in leaf extracts. Col-0 leaf protein extracts were incubated at room temperature in absence (black), or in presence of 0.5 mM DTT, alone (blue), or with 20  $\mu$ M TRX y2 (red), or TRX f1 (green) prior to measuring NADH-MDHAR activity. Data correspond to means  $\pm$  SD ( $n = 4$ , from 2 independent experiments).

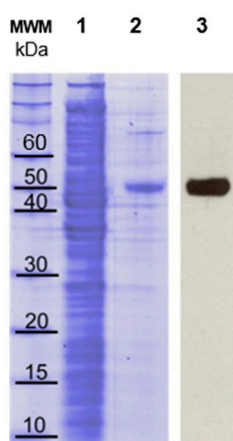

**Figure S2.** Purification of recMDHAR6. Protein sample analysis by SDS-PAGE and Coomassie staining : (1) Crude extract of *E. coli* cells producing recMDHAR6 (50  $\mu$ g of soluble crude extract), (2) Purified recMDHAR6 (3  $\mu$ g). Immunodetection of purified recMDHAR6 (3) by western blot using anti-strep-tag antibody as described in ref. [9].
